# Supplementary material for: Quality of life and survival survey of cancer cachexia in advanced non-small cell lung cancer patients—Japan nutrition and QOL survey in patients with advanced non-small cell lung cancer study
Source: Springer Nature journal article supplement (doi:10.1007/s00520-016-3156-8), 2016-03-22
Supplement: MOESM4 [file 8576480]

**Table 1. Patient Demographics**

| Gender | Male | 280 (69.0%) |
| --- | --- | --- |
|  | Female | 126 (31.0%) |
| Age | Mean±SD | 67.0±10.1 |
|  | Median (range) | 67 (33–87) |
| Height (cm) | Mean±SD | 161.5±8.9 |
|  | Median (range) | 162.0 (134.6–185.0) |
| Body weight (kg) | Mean±SD | 56.9±10.1 |
|  | Median (range) | 56.5 (31.9–92.7) |
| BMI | Mean±SD | 21.79±3.12 |
| Performance Status | 0 | 159 (39.2%) |
|  | 1 | 209 (51.5%) |
|  | 2 | 38 (9.4%) |
| Body weight loss | ≤5% | 187 (46.1%) |
| within 6 months | >5% | 30 (7.4%) |
| before registration | Unmeasured | 189 (46.6%) |
| Modified Glasgow | 0 | 373 (91.9%) |
| Prognostic Score | 1 | 1 (0.2%) |
|  | 2 | 27 (6.7%) |
|  | Unmeasured | 5 (1.2%) |

BMI, Body mass index.

**Table 2. Incidence Rate of Weight Loss (≥5%) in Observational Periods in Patients with Advanced Non–Small-Cell Lung Cancer**

|  | Observational periods | | | |
| --- | --- | --- | --- | --- |
|  | 1st | 2nd | 3rd | 4tha |
| Range of week | 4–12 | 16–24 | 28–36 | 40–52 |
| Total number of observation | 1112 | 865 | 704 | 713 |
| Weight loss (≥5%), n | 276 | 242 | 185 | 205 |
| Incidence rate | 0.248 | 0.280 | 0.263 | 0.288 |
| 95% CL (lower, upper) | (0.221, 0.279) | (0.247, 0.317) | (0.228, 0.304) | (0.251, 0.330) |
| Incidence rate ratio  (vs 1st ) | 1 | 1.127 | 1.059 | 1.158 |
| 95% CL (lower, upper) | - | (0.948, 1.340) | (0.879, 1.275) | (0.967, 1.388) |
| *P* value | - | 0.1740 | 0.5479 | 0.1108 |
| The 52-week observational period was divided into 4 periods: 1st, 4 to 12 week; 2nd, 16 to 24 week; 3rd, 28 to 36 week; 4th, 40 to 52 week.  a4 observation periods in 4th period only; all others had 3 observation periods.  CL, confidence limit. | | | | |

**Table 3. Principal Component Analysis of Cancer Cachexia**

| Symptoms comprising the factora | Degree of impact on the factorsb |
| --- | --- |
| Body weight loss | 0.654 |
| Decrease in handgrip strength | 0.592 |
| Fluid retention | 0.178 |
| Gastrointestinal tract disturbance | 0.420 |
| Anorexia | 0.825 |
| Motor function disorder | 0.124 |
| Pain | 0.525 |
| Fatigue | 0.749 |
| Respiratory embarrassment | 0.116 |
| Steroid administration | 0.002 |
| Parenteral hyperalimentation | 0.458 |

aEvaluated at date of weeks closest to when the maximum change in quality of life was observed.

b Figures closer to 1.000 indicate a stronger impact.
